# Supplementary material
Source: Preprints.org preprint supplement (doi:10.20944/preprints202101.0007.v1)
Supplement: Supplementary file 1 [file supplementary]

**SUPPLEMENTAL**

**Monitoring human impact in show caves. A study of four Romanian caves**

Silviu Constantin 1,2,3*, Oana Teodora Moldovan 2,3,4*, Ionuț Cornel Mirea 1,2, Alexandru Petculescu 1,2, Răzvan Adrian Arghir 1,2, Dragoș Ștefan Măntoiu 4, Marius Kenesz 2,4 and Marius Robu 1

1 Emil Racovita Institute of Speleology, Department of Geospeleology and Paleontology, Frumoasă 31, București, Romania; silviu.constantin@iser.ro

2 Romanian Institute of Science and Technology, Saturn 24-26, Cluj-Napoca, Romania

3 Centro Nacional de Investigacion sobre la Evolucion Humana, CENIEH, Paseo de Atapuerca s/n, Burgos, Spain

4 Emil Racovita Institute of Speleology, Department of Cluj, Clinicilor 5, Cluj-Napoca, Romania, oanamol35@gmail.com


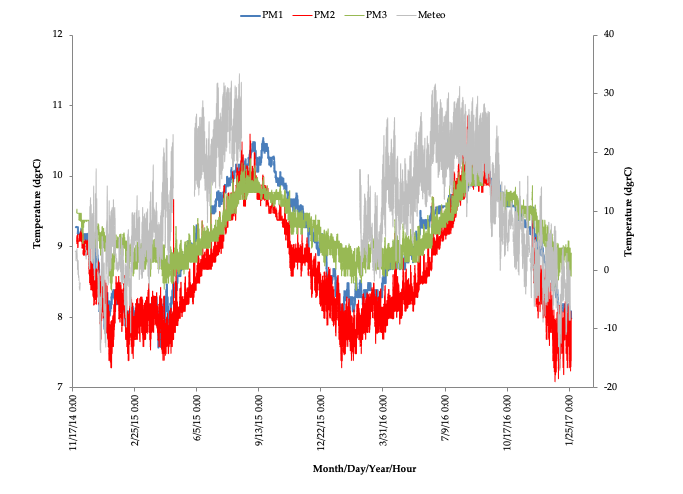


Figure S1. Temperature variation in the fixed monitoring stations PM1, PM2 and PM3, in comparison with the values recorded on the surface. The highest temperature variations are recorded in the PM2 station. Smaller variations are recorded in PM1, located in a side passage that is less frequently visited, as well as in PM3, located at the greatest distance from any of the two entrances.


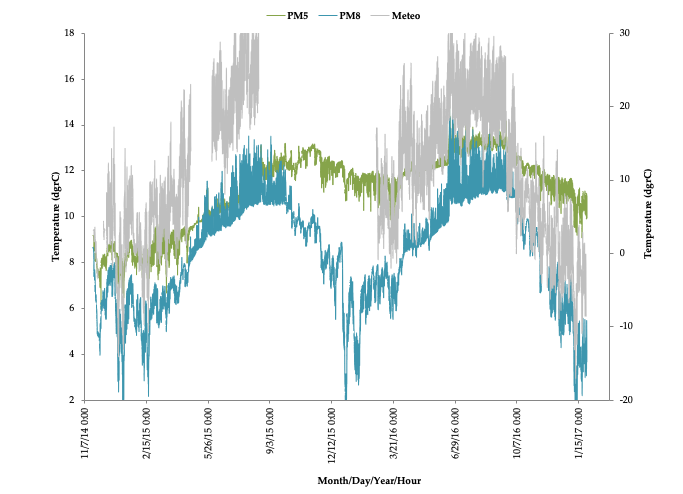


Figure S2. Temperature variation in the fixed monitoring stations, PM5 and PM8 and the temperature recorded by the surface weather station. In the PM8 station the air temperature is much influenced by the variations of the surface temperature varying by about 10 °C between the lows recorded in January-February and the highs recorded in August-September.


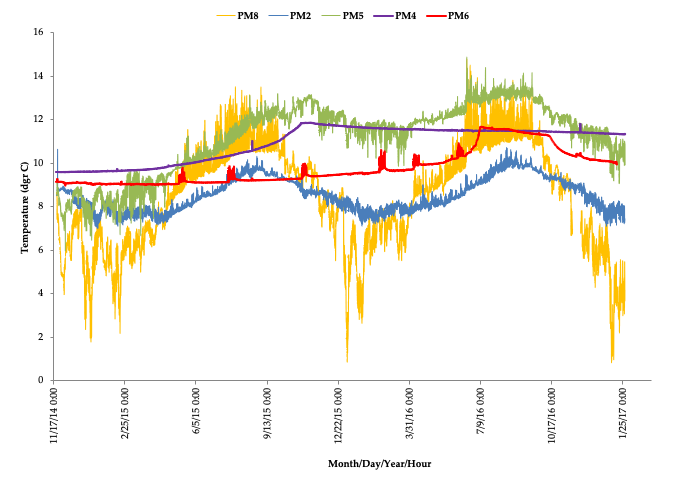


Figure S3. Temperature variation in stations PM2, PM4, PM5, PM6 (excavation place) and PM8 (exit gallery). The temperature increases recorded in point PM6 coincide with the 6 excavation campaigns carried out by ERIS researchers.


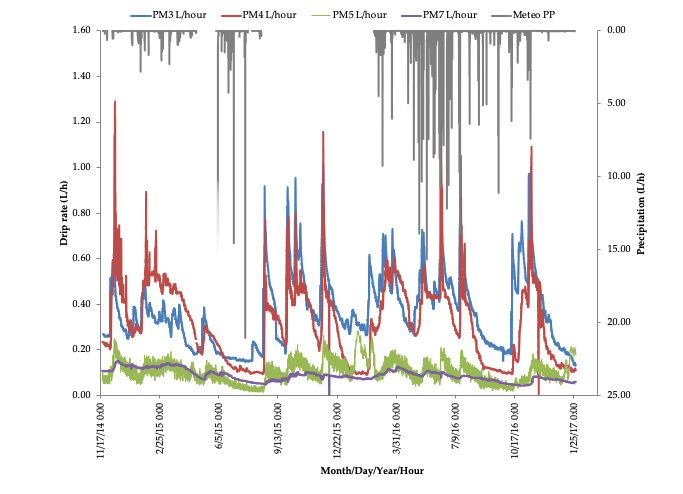


Figure S4. Variation of the drip rate in PM3, PM4, PM5 and PM7 stations compared to the precipitation values at Baia de Fier station.


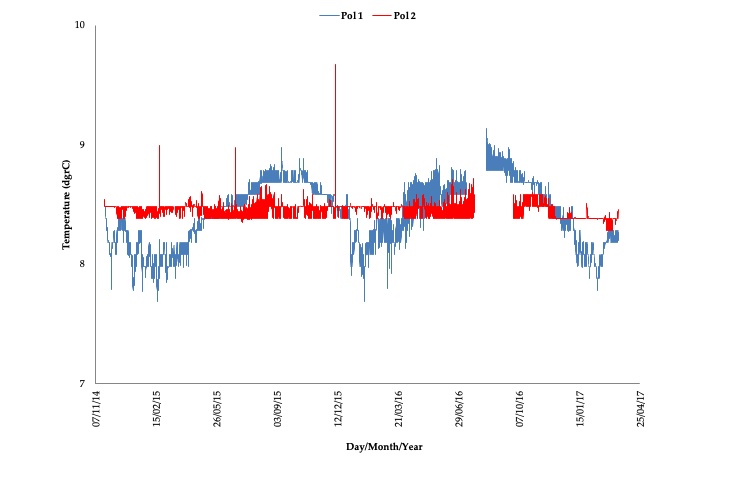


Figure S5. Temperature (°C) variation in the two monitoring stations in Polovragi Cave. The isolated temperature increases in the Pol2 station are due to the influence of the researchers during the monitoring visits.


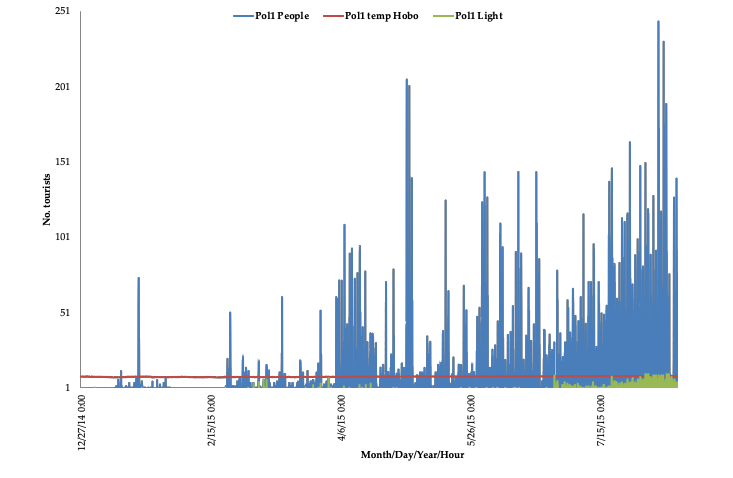


Figure S6. The variation of tourist traffic in Pol1 station (compared with that of luminosity

and air temperature values between December 2014-August 2015.


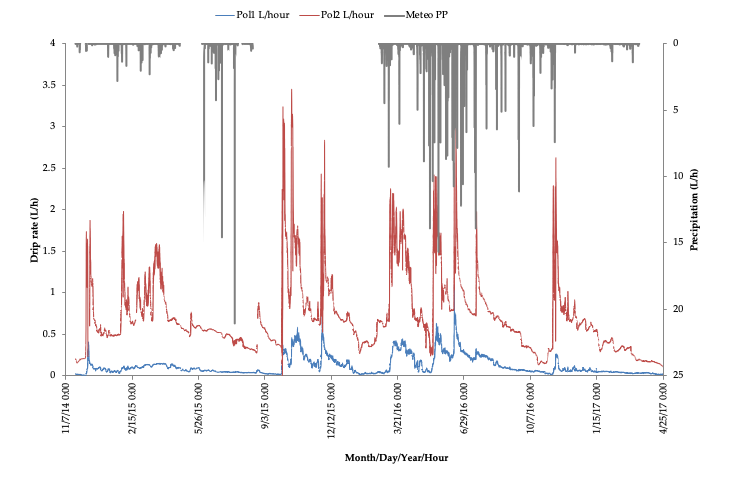


Figure S7. Variation of the drip rate in Pol 1 and Pol 2 stations compared to the precipitation values at Baia de Fier climatic station. All values in L/m2 (hourly amounts).


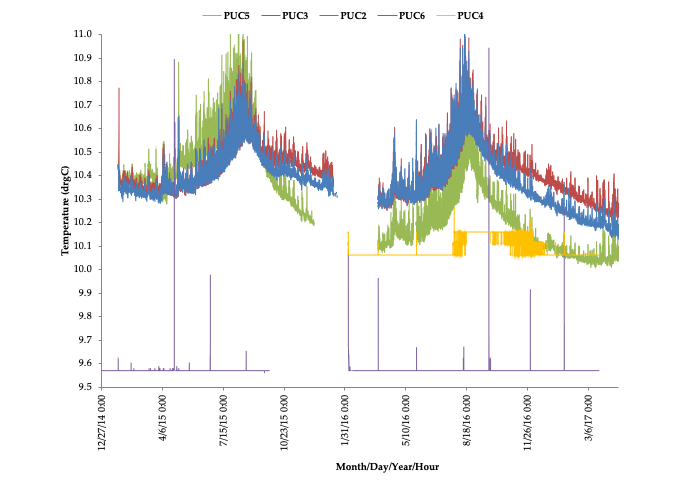


Figure S8. Temperature variation (°C) in the fixed monitoring stations PUC2, PUC3, PUC4, PUC5 and PUC6. The isolated peaks in PUC6 and PUC4 stations in some days are due to the presence of the operator during the monitoring visits.

Figure S9. The variations of the air temperature in the PUC3 station in the presence of two groups (50-60 people/hour) on January 21st 2016.

Figure S10. Temperature variation related to the registered traffic, respectively light intensity, in PUC2 station, in the interval 16-18 May 2015.

Figure S11. Temperature variation in the PUC2 station correlated with the light in the absence of tourists. The light was allowed to operate on the night of May 18th to 19th 2015.


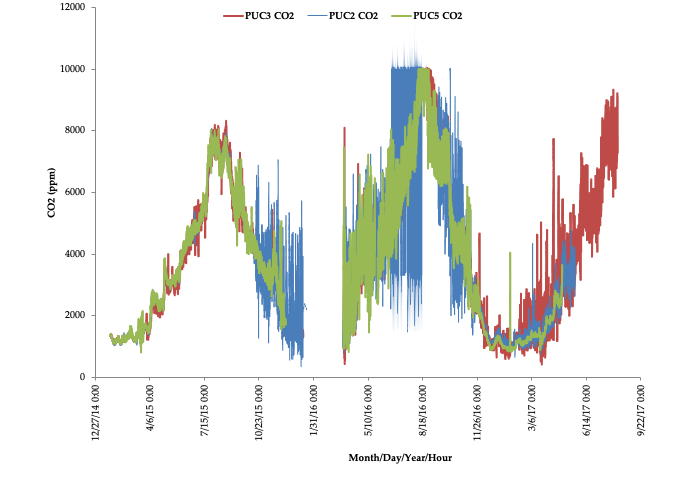


Figure S12. CO2 concentrations measured at PUC2, PUC3 and PUC5 stations in the Ursilor Cave. Values ​​exceeding 10,000 ppm could not be measured accurately as they exceed the limits of the sensor.


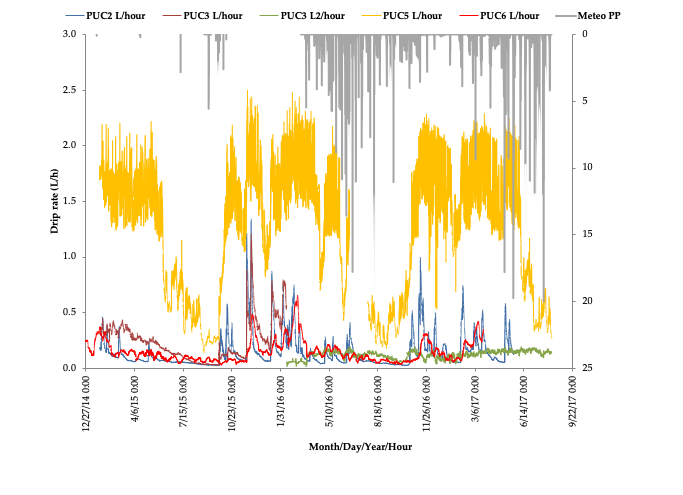


Figure S13. The variation of the drip rate in the stations PUC2, PUC3, PUC5 and PUC6 compared to the precipitation values ​​at the Urşilor Cave weather station.


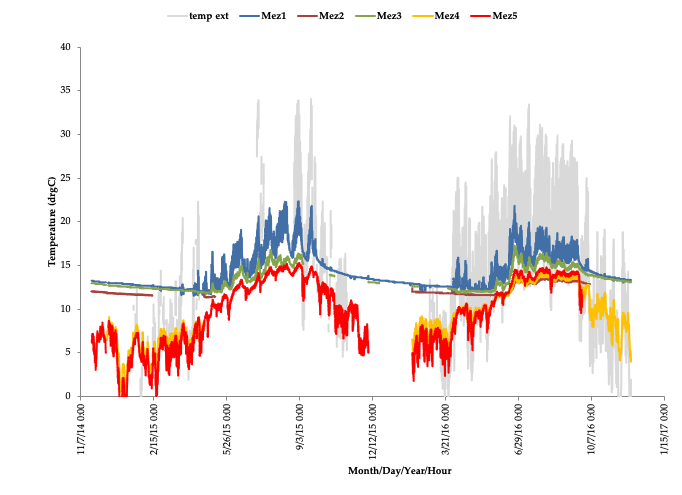


Figure S14. The temperature (°C) variation in the five monitoring stations from the Meziad Cave compared to the variation of the outdoor temperature registered at the Ursilor Cave weather station.


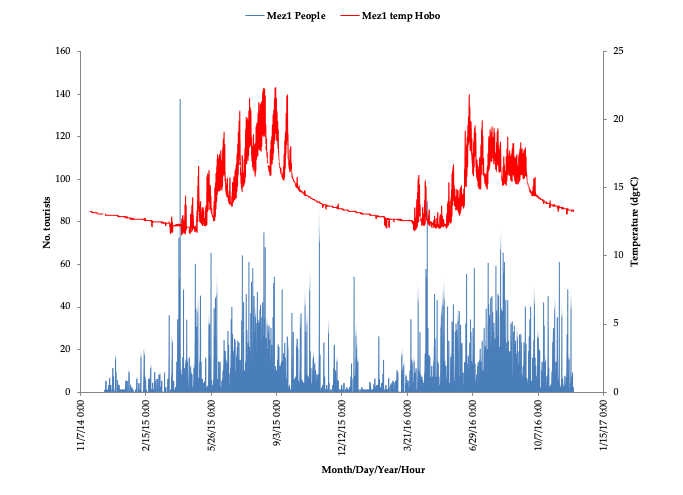


Figure S15. The variation of the traffic in Mez1 station in parallel with that of the air temperature between December 2014-December 2017. No correlation can be observed between the two variables, the temperature values reflecting the seasonal variations.


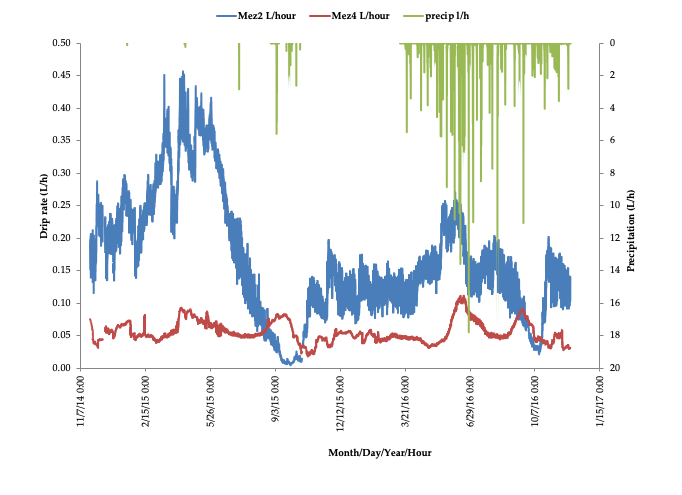


Figure S16. Variation of the drip rate in Mez2 and Mez4 stations compared to precipitation values.
